# Supplementary material for: A high-performance capillary-fed electrolysis cell promises more cost-competitive renewable hydrogen
Source: PubMed Central journal article supplement (PMC8924184; doi:10.1038/s41467-022-28953-x), 2022-03-15
Supplement: 41467_2022_28953_MOESM3_ESM.pdf [file 41467_2022_28953_MOESM3_ESM.pdf]

Description of Additional Supplementary Files

File name: Supplementary Data 1

Description: Excel Calculator: Heat Output of Water Electrolysis Cell or Cell Stack
